# Supplementary material for: The effect of a ruthenium precursor on the low-temperature ammonia synthesis activity over Ru/CeO2
Source: Royal Society of Chemistry journal article supplement (doi:10.1039/d0dt01974g), 2020-01-01
Supplement: d0dt01974g1.pdf [file d0dt01974g1.pdf]

Supporting information

# Effect of the ruthenium precursor on the low-temperature ammonia synthesis activity over Ru/CeO<sub>2</sub>

Yuichi Manaka,<sup>\*ab</sup> Yuki Nagata,<sup>ac</sup> Keisuke Kobayashi,<sup>a</sup> Daisuke Kobayashi<sup>c</sup> and Tetsuya Nanba<sup>\*a</sup>

<sup>a</sup> *Renewable Energy Research Center, National Institute of Advanced Industrial Science and Technology, 2-2-9 Machiikedai, Koriyama, Fukushima, 963-0298 JAPAN*  
*E-mail: Yuichi.manaka@aist.go.jp, tty-namba@aist.go.jp*

<sup>b</sup> *School of Material and Chemical Technology, Tokyo Institute of Technology, 4259 Nagatsuta-cho, Midori-ku, Yokohama, Kanagawa, 226-8502 JAPAN*

<sup>c</sup> *Department of Applied Chemistry, Tokyo Denki University, 5 Senju-Asahicho, Adachi-ku, Tokyo 120-8551, JAPAN*

## Catalyst preparation

CeO<sub>2</sub> (167 m<sup>2</sup>/g) was purchased from Daiichi-Kigenso. Ru(NO<sub>3</sub>)<sub>3</sub>, Ru(NH<sub>3</sub>)<sub>6</sub>Cl<sub>3</sub>, and RuCl<sub>3</sub> were purchased from TANAKA KIKINZOKU KOGYO K.K. Na<sub>2</sub>RuO<sub>4</sub>, Ru(dpm)<sub>3</sub>, Ru(acac)<sub>3</sub>, and Ru<sub>3</sub>(CO)<sub>12</sub> were purchased from Furuya Metal Co., Ltd. Ru(NO)(NO<sub>3</sub>)<sub>3</sub> was purchased from Strem Chemicals, Inc. [Ru(OH)(NO)(NH<sub>3</sub>)<sub>4</sub>](NO<sub>3</sub>)<sub>2</sub> was purchased from N.E. CHEMCAT. All chemicals were used as received without further purification.

The Ru precursors were diluted with water or ethanol (for Ru(acac)<sub>3</sub> and Ru(dpm)<sub>3</sub>) or THF (for Ru<sub>3</sub>(CO)<sub>12</sub>) to ensure that the CeO<sub>2</sub> support was immersed in a volume of Ru solution twice as large as the support void volume (the concentration of Ru was adjusted to 1wt% loading). Ru was loaded on CeO<sub>2</sub> via the incipient wetness method. Ru/CeO<sub>2</sub> was dried overnight at 100 °C. Ru/CeO<sub>2</sub> was calcined using a tubular furnace under a 10% H<sub>2</sub> stream at 300 °C for 1 h. The calcined Ru/CeO<sub>2</sub> was sized to a particle size of 150–250 µm.

## Catalytic reaction

The catalytic activity was measured in a fixed-bed flow reactor. A portion of the catalyst (0.2 g) was set on quartz glass wool in the middle of the reactor, and the thermocouple was set up in the catalyst bed. Pretreatment was performed under a 30 mL/min flow of H<sub>2</sub> gas and 10 mL/min of N<sub>2</sub> gas at 600 °C for 30 min. Ammonia production was measured under atmospheric pressure conditions between 300 and 600 °C. An H<sub>2</sub>/N<sub>2</sub> gas ratio of 3 and an SV 40,000 h<sup>-1</sup> were employed. To carry out measurements in the steady state, the amount of ammonia produced was measured 90 min after each reaching the measurement temperature. The product gases were analysed by FT-IR spectrophotometry (Nicolet iS50 FT-IR spectrophotometer, Thermo Fisher Scientific) with a multi-reflection gas cell (optical path length = 2.4 m, measured wavelength = 4000 to 600 cm<sup>-1</sup>, interval = 0.5 cm<sup>-1</sup>). The NH<sub>3</sub> concentration was quantified using the calibration curve prepared with standard gas. The FT-IR absorbance band at 1122 cm<sup>-1</sup> represented the peak of NH<sub>3</sub>. Because the amount of Ru differs for each catalyst, the ammonia concentration was calculated in units of (1 wt% Ru, 2.0 g). The reproducibility of the catalytic reaction was confirmed, as shown in Fig. S4.

## Characterization

Nitrogen adsorption-desorption measurements were performed at -196 °C using a BELSORP-mini II instrument (Microtrac BEL). The samples were degassed under vacuum at 100 °C for 3 h prior to measurement. The pore size distributions were calculated using the Brunauer–Joyner–Halenda (BJH) method, and the specific surface areas of the samples were estimated using the Brunauer–Emmett–Teller (BET) method. Pulse CO chemisorption measurements were performed using a ModelR6015H instrument (Ohkura Riken). O<sub>2</sub> gas at 400 °C was employed for the oxidation process, and H<sub>2</sub> gas at 600 °C was employed for the reduction process. The CO/Ru ratio was calculated using the following equation:

$$\text{CO/Ru (\%)} = \text{adsorbed CO amount (mol)} / \text{loaded Ru amount (mol)} \times 100$$

H<sub>2</sub>-temperature-programmed reduction (TPR) measurements were performed using a handmade setup with a JMS-MT3010HRGA INFITOF instrument (JEOL Ltd.) using a catalyst loading of 0.15 g. For oxidising pretreatment, a flow of 10% O<sub>2</sub>/He gas was used at 200 °C for 1 h. For measurement, a flow of 1% H<sub>2</sub>/He

was employed between  $-70$  and  $900$   $^{\circ}\text{C}$  at a heating rate of  $10$   $^{\circ}\text{C min}^{-1}$ . X-ray diffraction (XRD) patterns were recorded on a RINT Ultima+ instrument (RIGAKU) with  $\text{CuK}\alpha$  radiation at  $45$  keV and  $200$  mA.

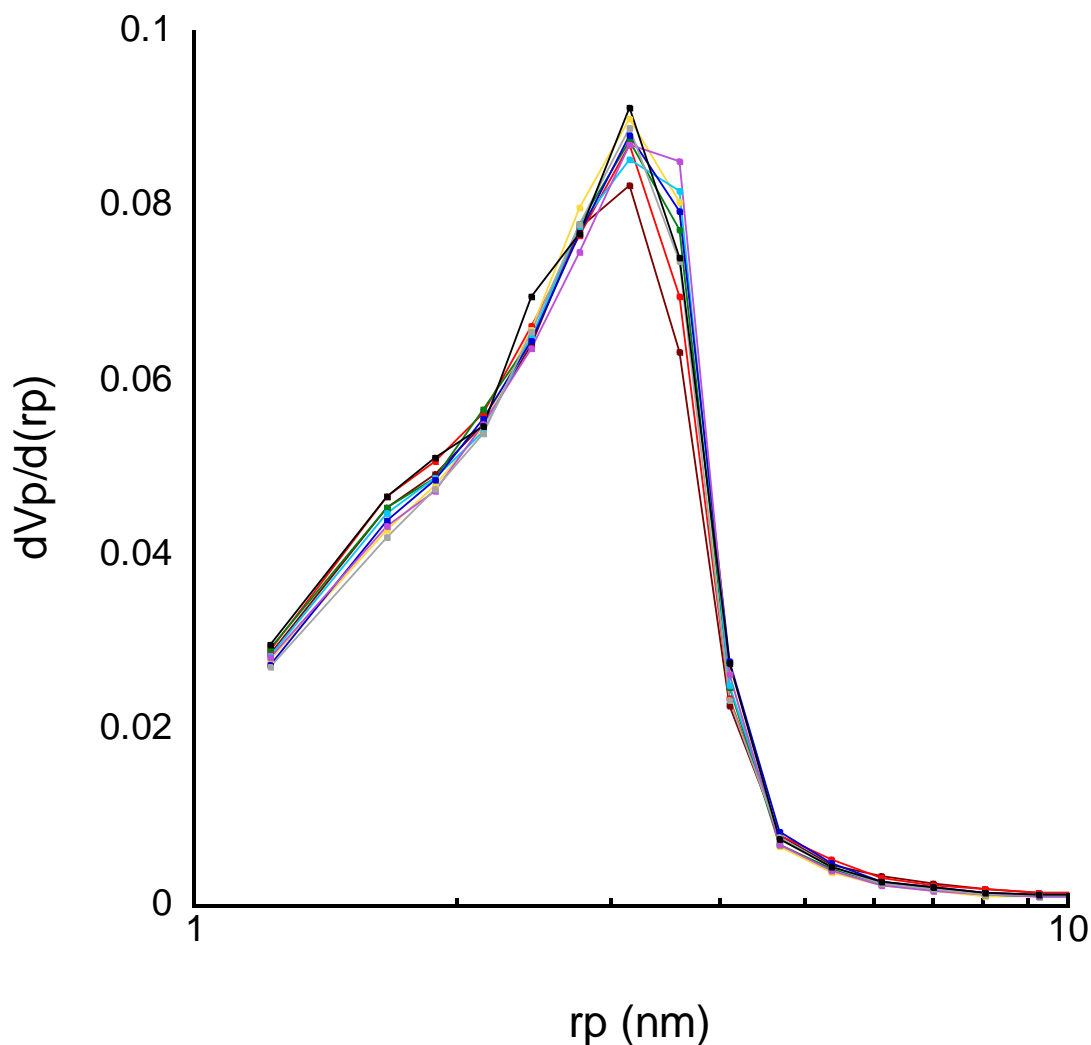

Fig. S1. BJH plot of each of the Ru/CeO<sub>2</sub> catalysts calculated using the adsorption-desorption method. Different precursors are indicated by the differently colored lines: Brown: Ru(NO)(NO<sub>3</sub>)<sub>3</sub>, Red : Ru(acac)<sub>3</sub>, Yellow: Ru(CO)<sub>12</sub>, Green: Ru(dpm)<sub>3</sub>, Pale blue: [Ru(OH)(NO)(NH<sub>3</sub>)<sub>4</sub>](NO<sub>3</sub>)<sub>2</sub>, Blue: Ru(NO<sub>3</sub>)<sub>3</sub>, Purple: RuCl<sub>3</sub>, Gray: Ru(NH<sub>3</sub>)<sub>6</sub>Cl<sub>3</sub>, Black: CeO<sub>2</sub>. Measurement conditions are described in the experimental section.

Table S1. Properties of Ru/CeO<sub>2</sub> catalysts

| Ru precursor                                                                | Pore volume<br>(cm <sup>3</sup> /g) | Pore radius (nm) | S <sub>BET</sub> / (m <sup>2</sup> /g) |
|-----------------------------------------------------------------------------|-------------------------------------|------------------|----------------------------------------|
| Ru(NO)(NO <sub>3</sub> ) <sub>3</sub>                                       | 0.24                                | 5.9              | 162                                    |
| Ru(acac) <sub>3</sub>                                                       | 0.25.                               | 6.0              | 167                                    |
| Ru(CO) <sub>12</sub>                                                        | 0.24                                | 5.7              | 166                                    |
| Ru(dpm) <sub>3</sub>                                                        | 0.24                                | 5.7              | 169                                    |
| [Ru(OH)(NO)(NH <sub>3</sub> ) <sub>4</sub> ](NO <sub>3</sub> ) <sub>2</sub> | 0.24                                | 5.8              | 165                                    |
| Ru(NO <sub>3</sub> ) <sub>3</sub>                                           | 0.24                                | 6.0              | 162                                    |
| RuCl <sub>3</sub>                                                           | 0.24                                | 5.8              | 165                                    |
| Ru(NH <sub>3</sub> ) <sub>6</sub> Cl <sub>3</sub>                           | 0.24                                | 5.9              | 163                                    |
| - (CeO <sub>2</sub> )                                                       | 0.24                                | 5.8              | 167                                    |

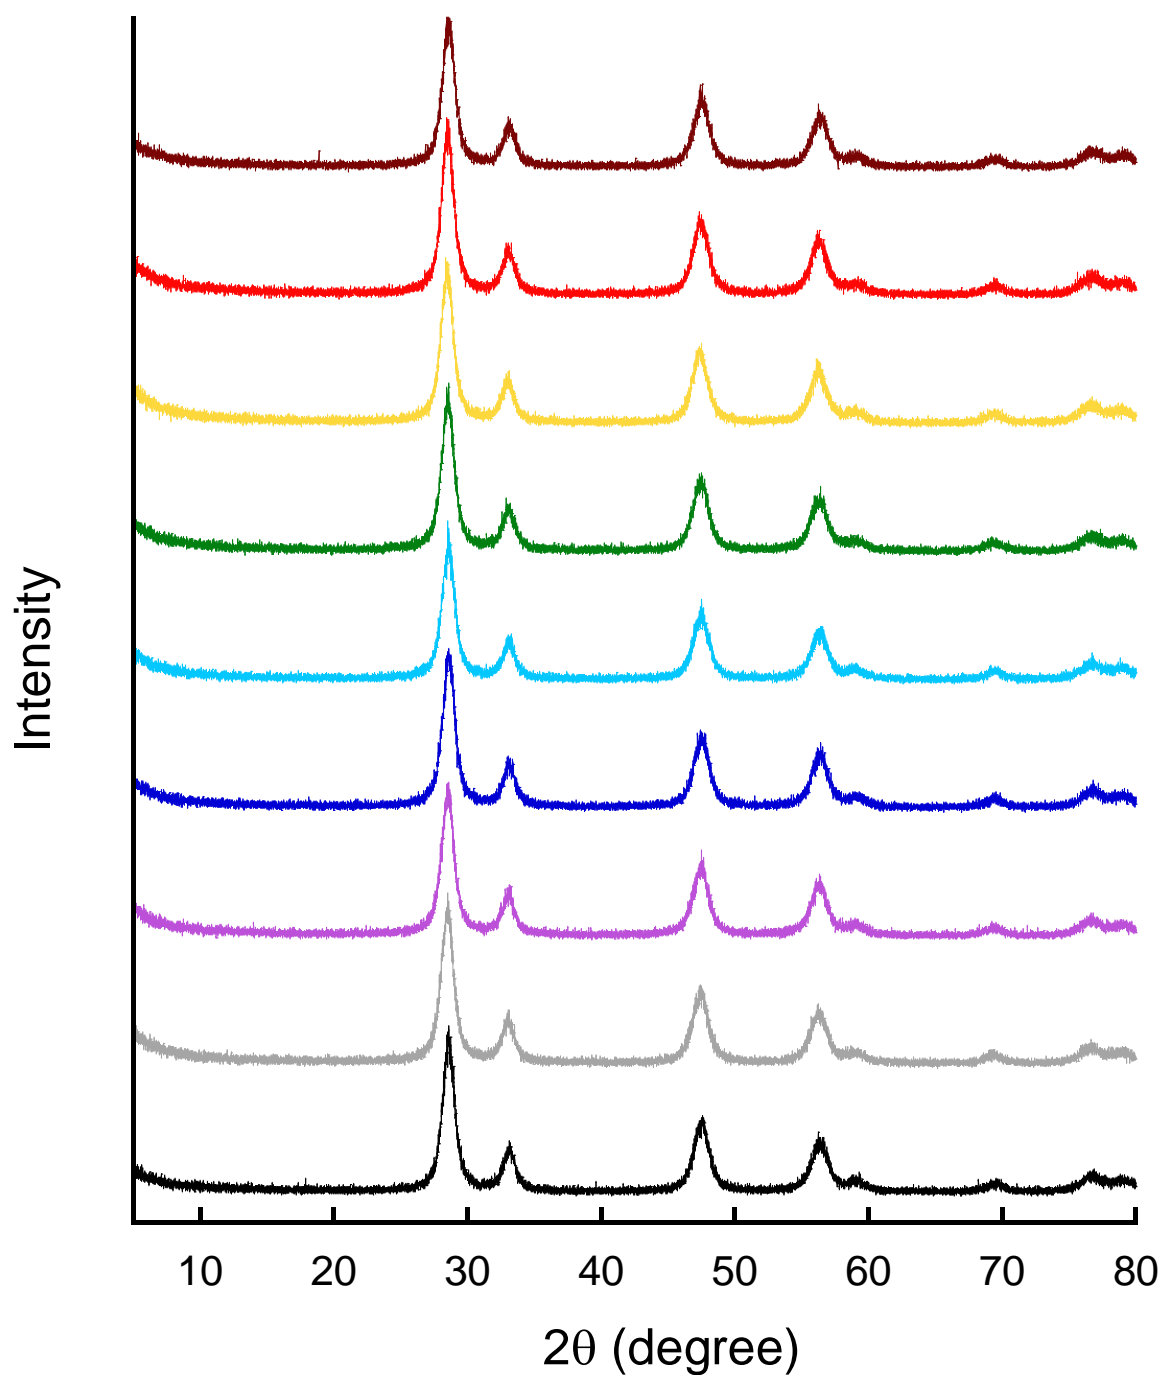

Fig. S2. XRD patterns of the Ru/CeO<sub>2</sub> catalysts. Different precursors are indicated by the differently colored lines: Brown: Ru(NO)(NO<sub>3</sub>)<sub>3</sub>, Red: Ru(acac)<sub>3</sub>, Yellow: Ru(CO)<sub>12</sub>, Green: Ru(dpm)<sub>3</sub>, Pale blue: [Ru(OH)(NO)(NH<sub>3</sub>)<sub>4</sub>](NO<sub>3</sub>)<sub>2</sub>, Blue: Ru(NO<sub>3</sub>)<sub>3</sub>, Purple: RuCl<sub>3</sub>, Gray: Ru(NH<sub>3</sub>)<sub>6</sub>Cl<sub>3</sub>, Black: Na<sub>2</sub>RuO<sub>4</sub>. Measurement conditions are described in the experimental section.

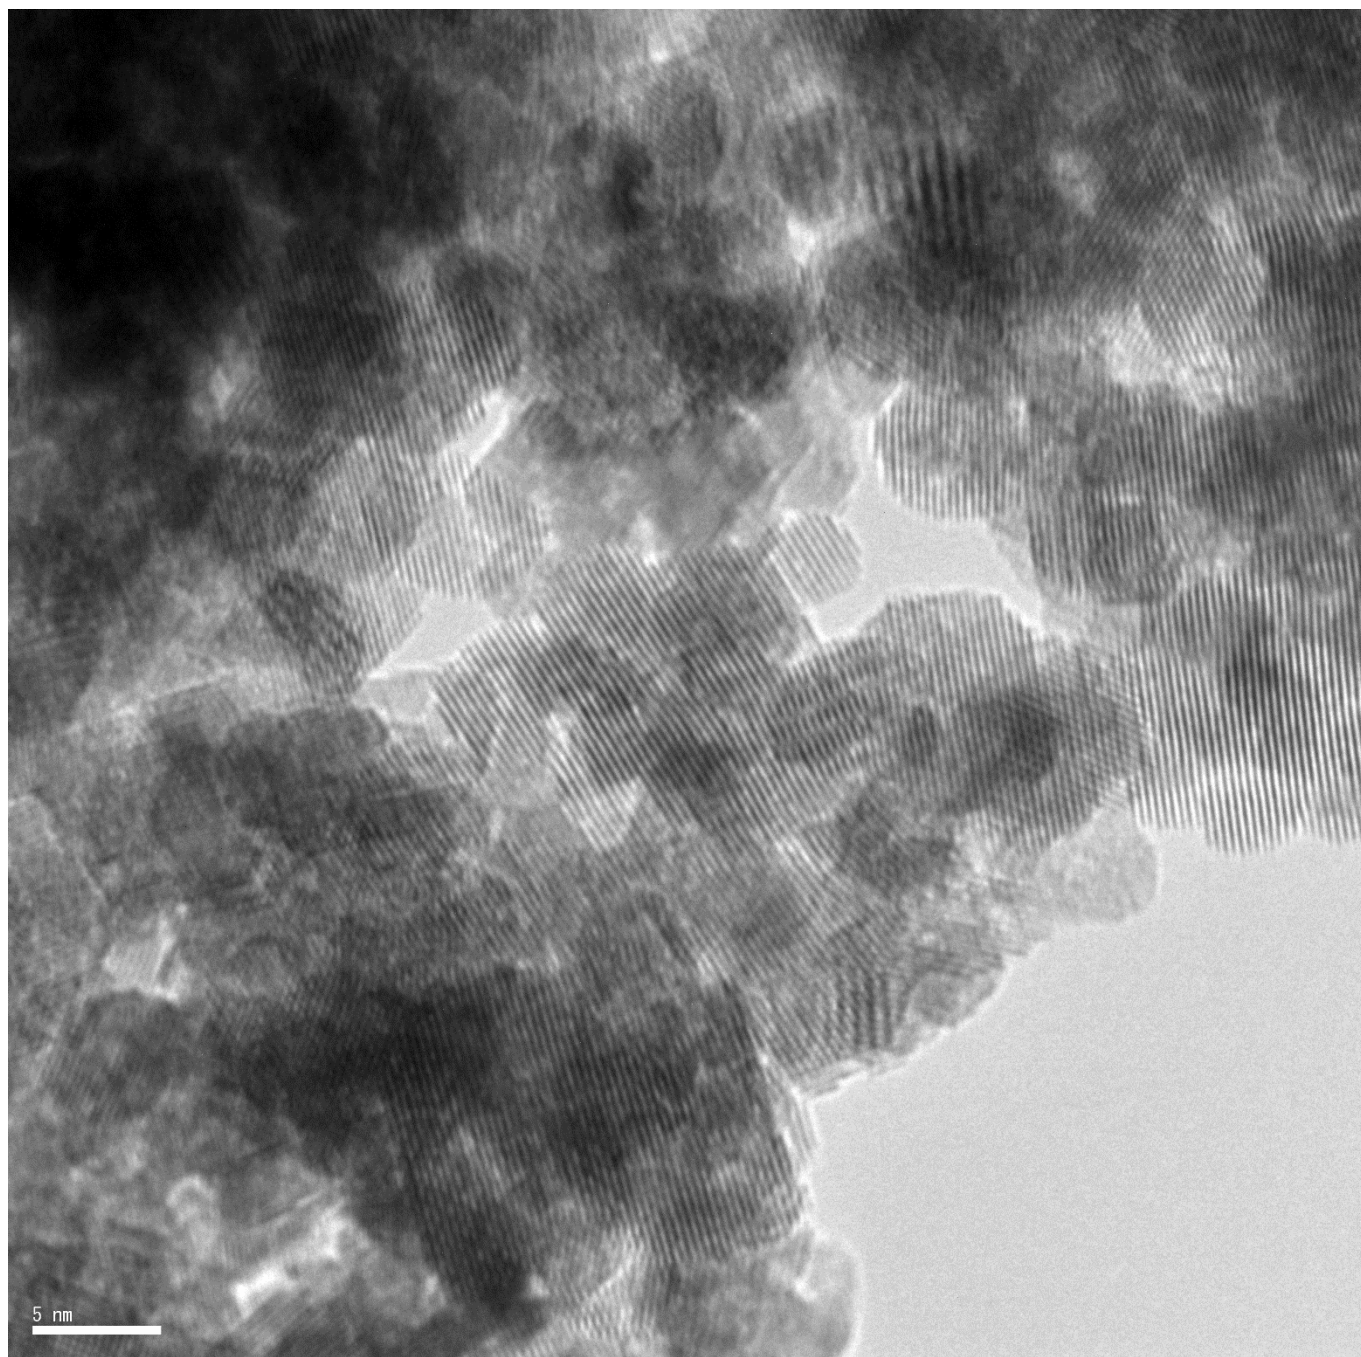

Fig. S3(a). TEM measurement for the Ru/CeO<sub>2</sub> catalysts. (a) Ru(NO)(NO<sub>3</sub>)<sub>3</sub> as precursor.

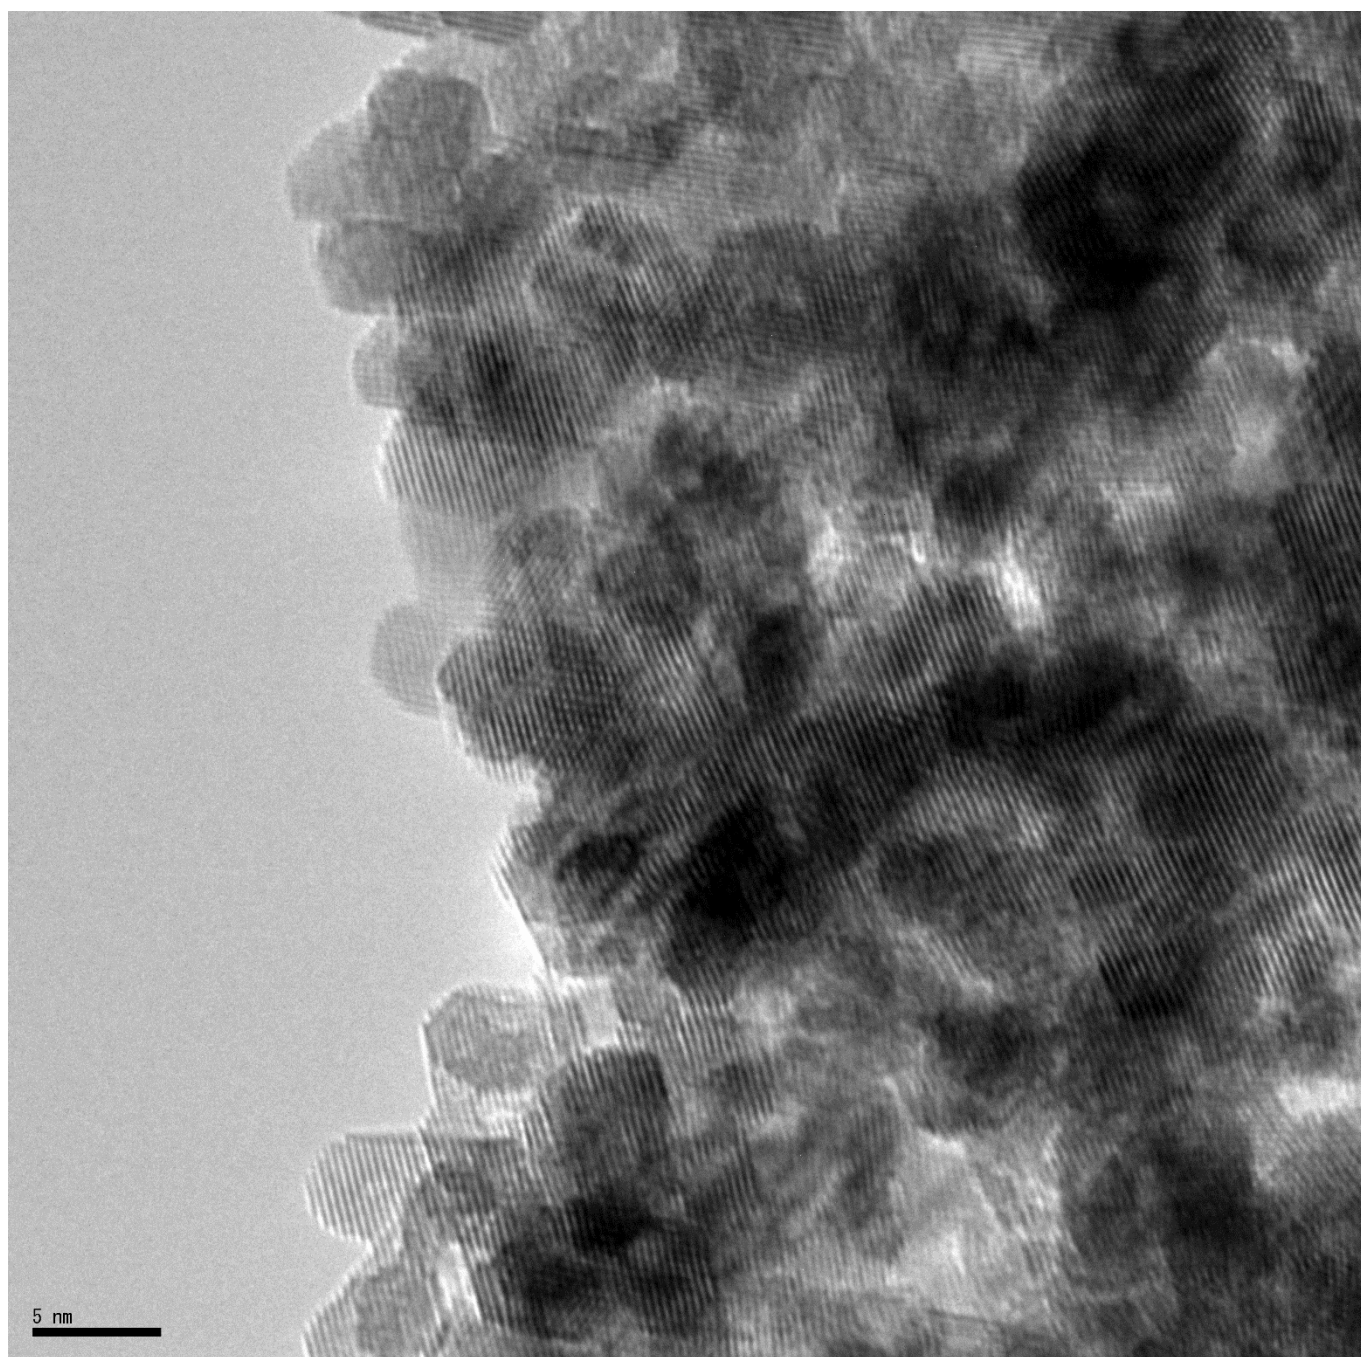

Fig. S3(b). (b)Ru(CO)<sub>12</sub> as precursor.

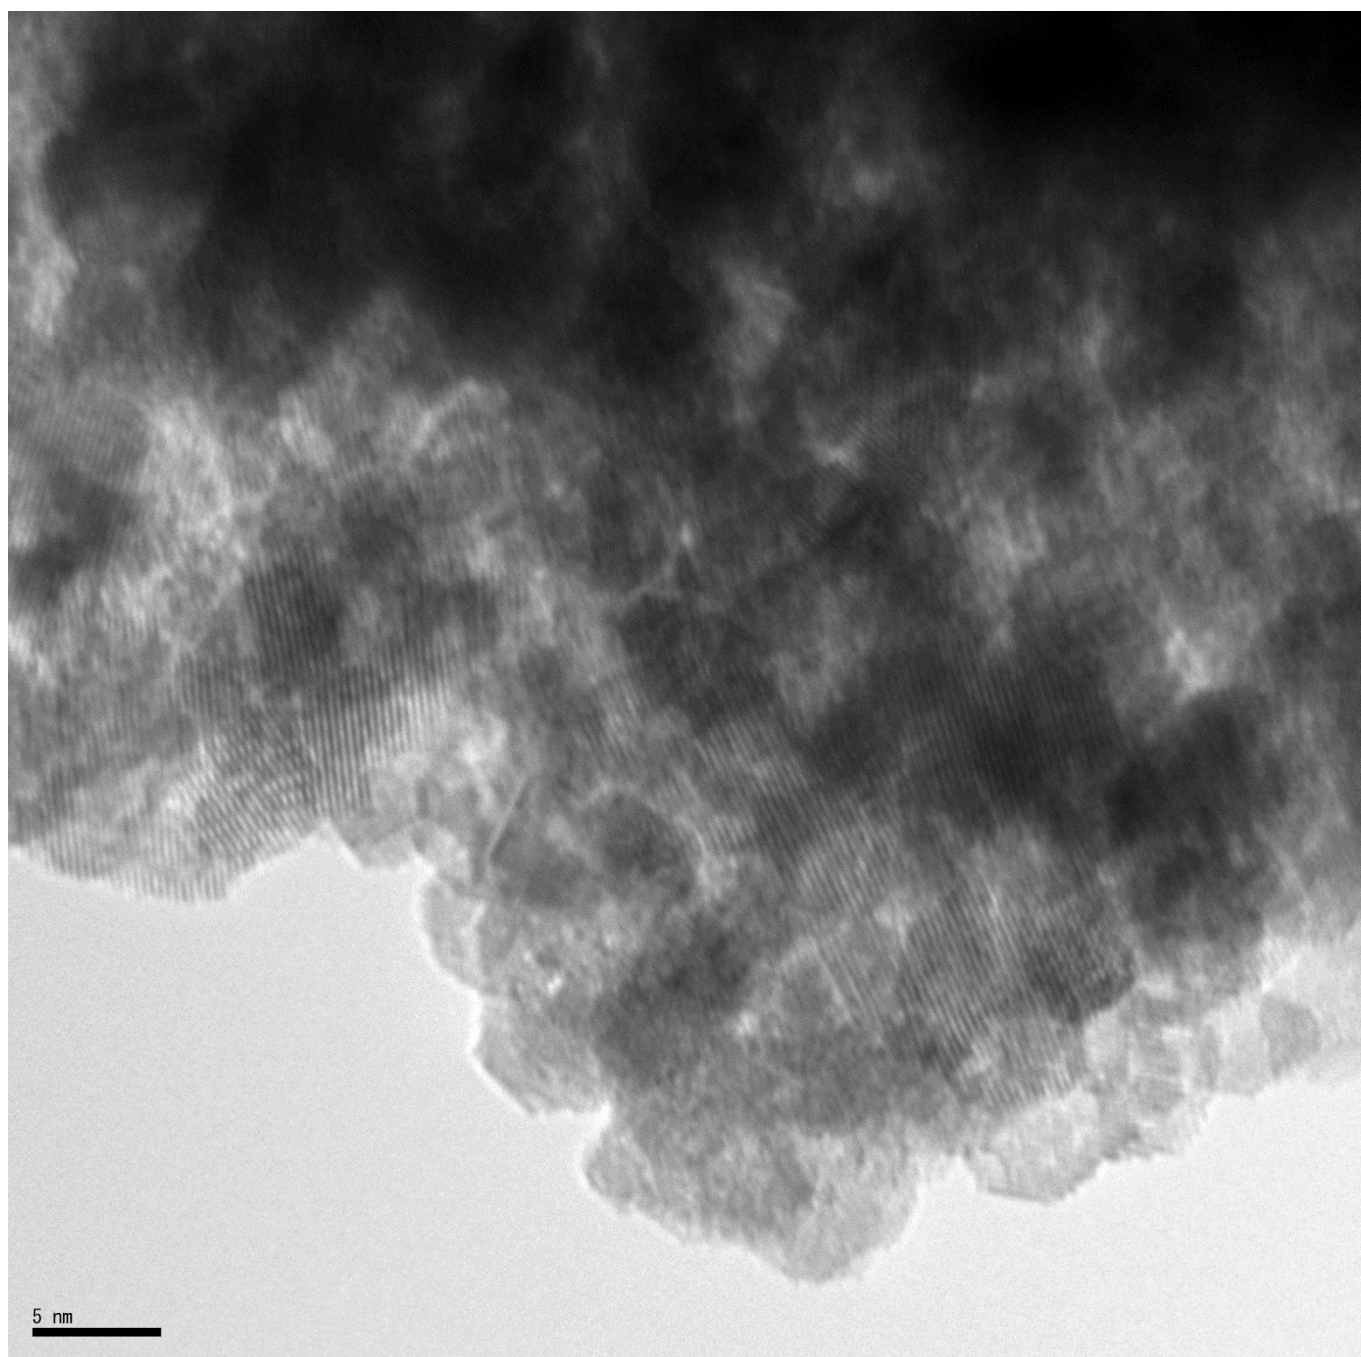

Fig. S3(c). (c)RuCl<sub>3</sub> as precursor.

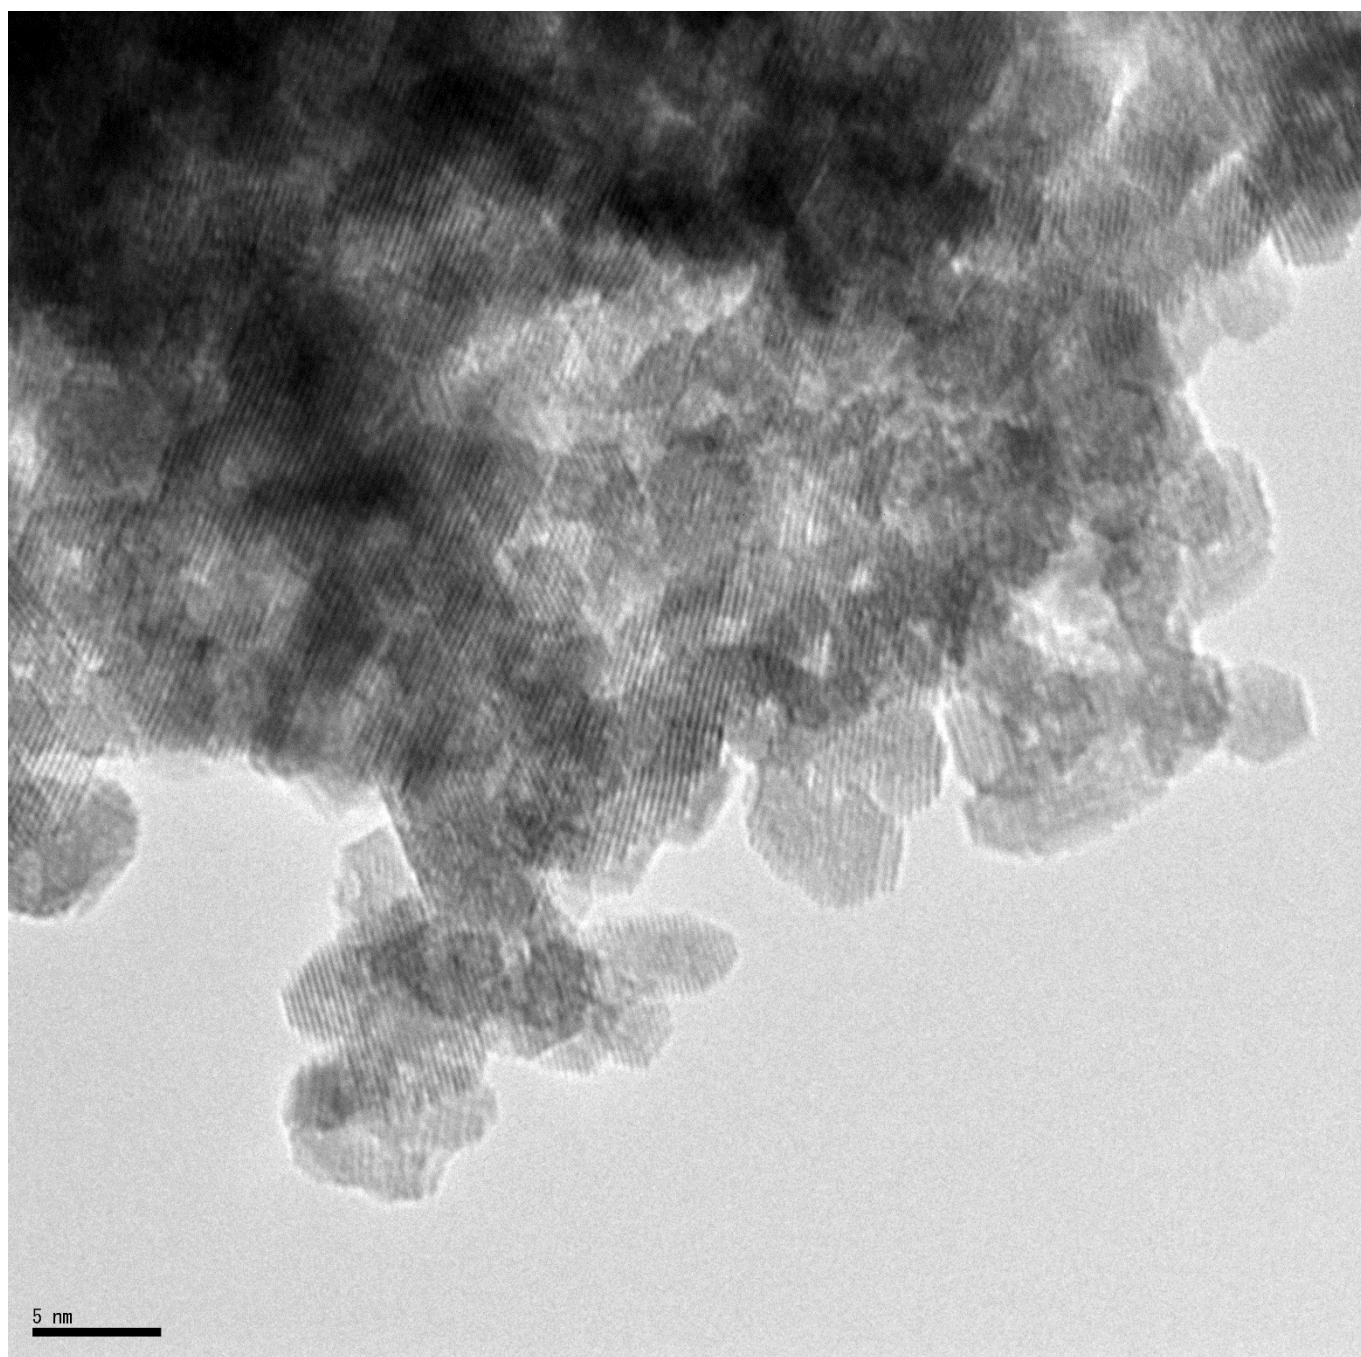

Fig. S3(d).  $(d)Ru(NH_3)_6Cl_3$  as precursor.

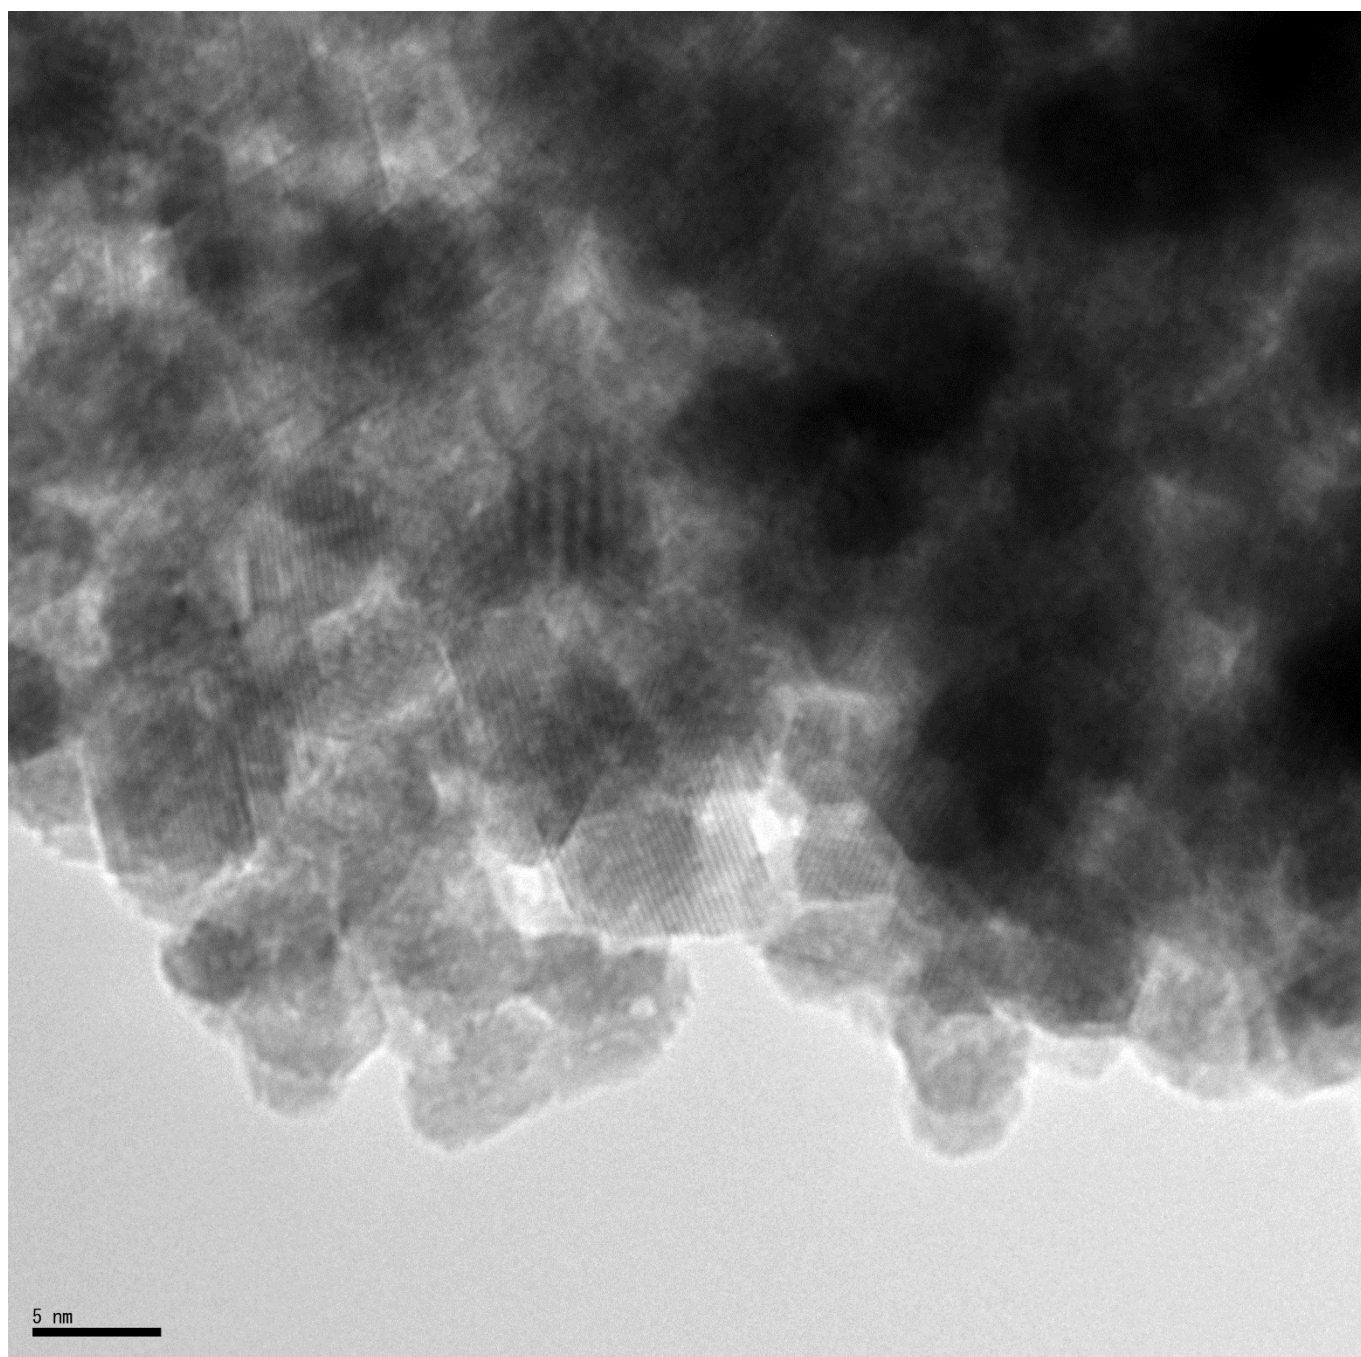

Fig. S3(e). (e) $\text{Na}_2\text{RuO}_4$  as precursor.

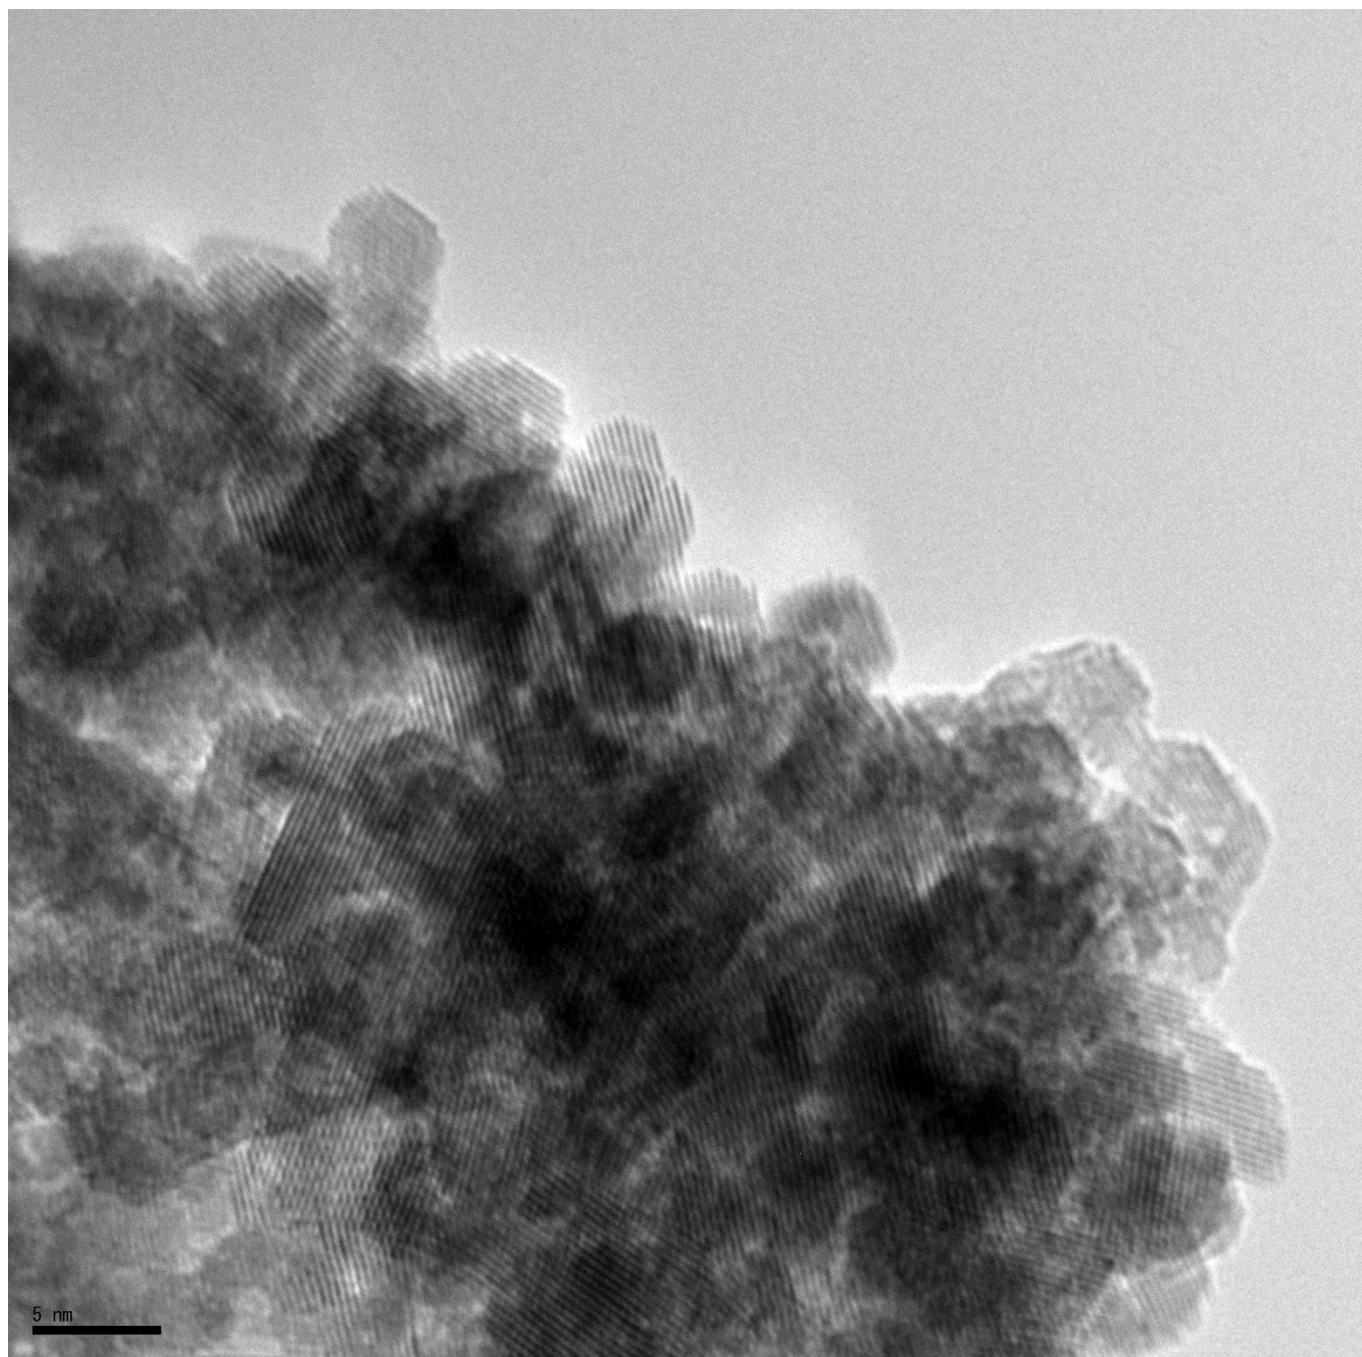

Fig. S3(f). TEM measurement for the CeO<sub>2</sub>.

Table S2. The relationship between Ru condition and catalytic activity

| Ru precursor                                                      | Particle size (Å) | Ru dispersion (%) | Ammonia synthesis ability@350 °C (ppm) |
|-------------------------------------------------------------------|-------------------|-------------------|----------------------------------------|
| $\text{Ru}(\text{NO})(\text{NO}_3)_3$                             | 7.2               | 127.4             | 809.2                                  |
| $\text{Ru}(\text{acac})_3$                                        | 5.8               | 158.2             | 753.5                                  |
| $\text{Ru}(\text{CO})_{12}$                                       | 6.0               | 154.2             | 788.7                                  |
| $\text{Ru}(\text{dpm})_3$                                         | 15.8              | 58.2              | 726.8                                  |
| $[\text{Ru}(\text{OH})(\text{NO})(\text{NH}_3)_4](\text{NO}_3)_2$ | 14.2              | 64.8              | 433.8                                  |
| $\text{Ru}(\text{NO}_3)_3$                                        | 8.6               | 107.6             | 450.3                                  |
| $\text{RuCl}_3$                                                   | 20.3              | 45.4              | 584.7                                  |
| $\text{Ru}(\text{NH}_3)_6\text{Cl}_3$                             | 12.2              | 75.7              | 468.9                                  |

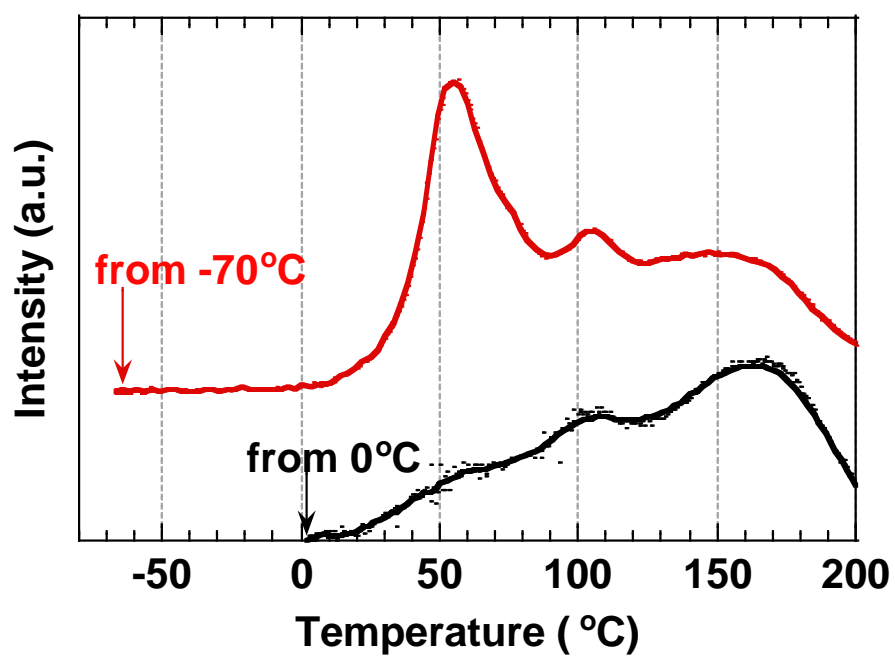

Fig. S4. H<sub>2</sub>-TPR profiles of the Ru/CeO<sub>2</sub> catalyst using Ru(acac)<sub>3</sub> as the precursor. Red line: measurement started at -70 °C, Black line: measurement started at 0 °C.

Table S3. ICP-analysis results

| Ru precursor                                                      | Loading Ru amount (wt%) | Measured Ru amount (wt%) |
|-------------------------------------------------------------------|-------------------------|--------------------------|
| $\text{Ru}(\text{NO})(\text{NO}_3)_3$                             | 1                       | 1.03                     |
| $\text{Ru}(\text{acac})_3$                                        | 1                       | 1.05                     |
| $\text{Ru}(\text{CO})_{12}$                                       | 1                       | 0.85                     |
| $\text{Ru}(\text{dpm})_3$                                         | 1                       | 0.94                     |
| $[\text{Ru}(\text{OH})(\text{NO})(\text{NH}_3)_4](\text{NO}_3)_2$ | 1                       | 0.82                     |
| $\text{Ru}(\text{NO}_3)_3$                                        | 1                       | 0.92                     |
| $\text{RuCl}_3$                                                   | 1                       | 0.74                     |
| $\text{Ru}(\text{NH}_3)_6\text{Cl}_3$                             | 1                       | 0.91                     |
| $\text{Na}_2\text{RuO}_4$                                         | 1                       | 1.32                     |

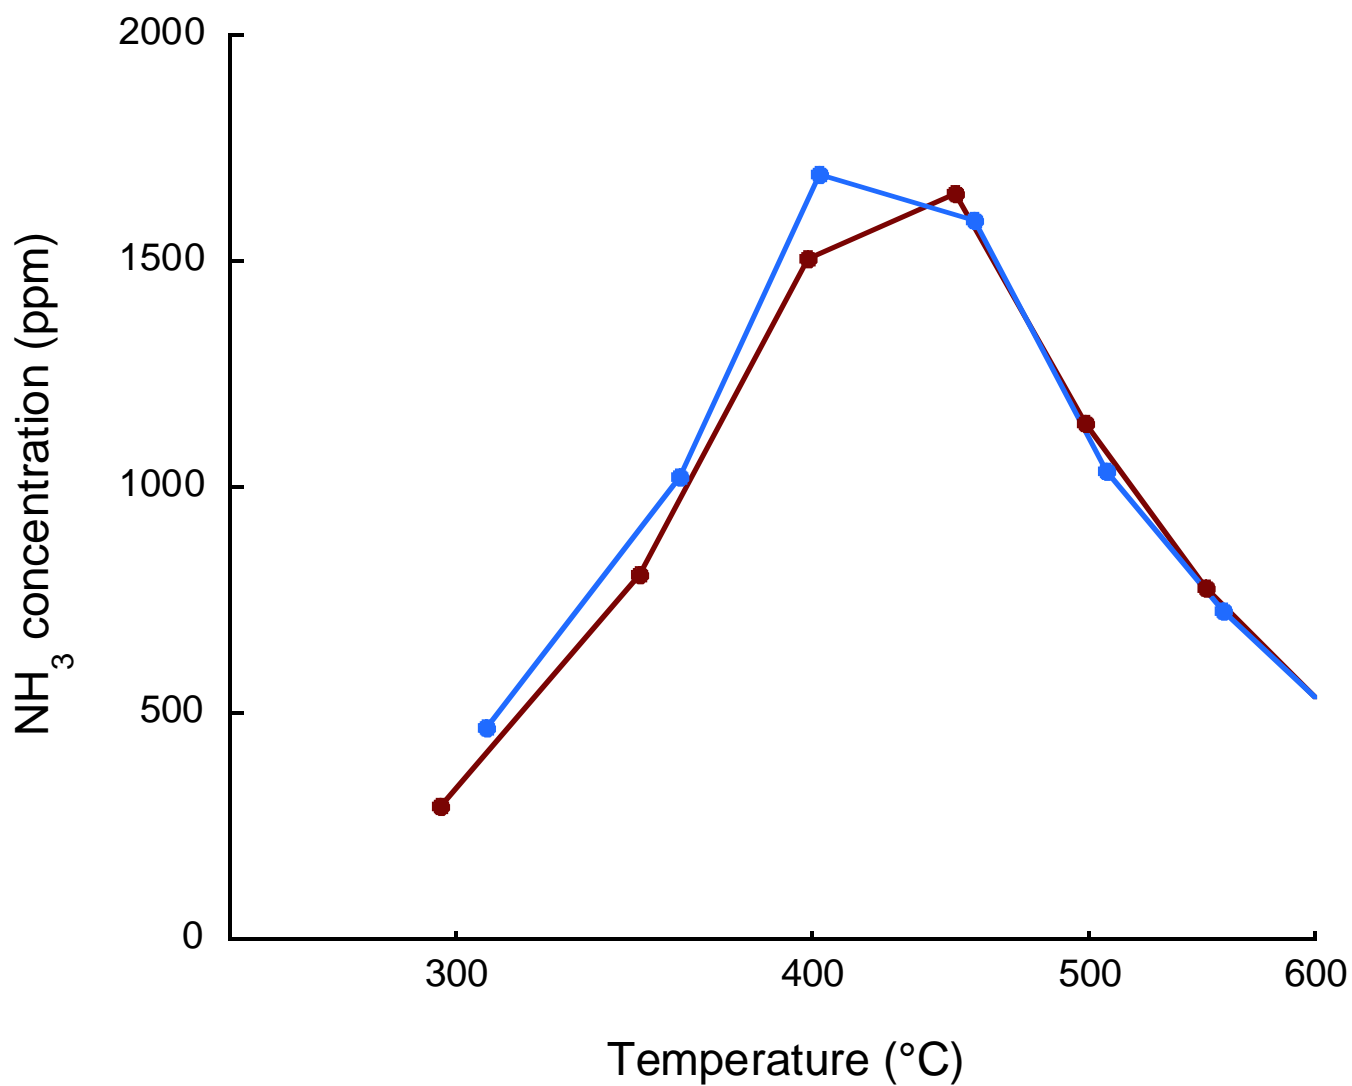

Fig. S4. The reproducibility of the catalytic reaction. Brown line: Ru(NO)(NO<sub>3</sub>)<sub>3</sub> precursor. Blue line: remeasurement result.
